# Supplementary material for: Effectiveness of Different Rituximab Doses Combined with Leflunomide in the Treatment or Retreatment of Rheumatoid Arthritis: Part 2 of a Randomized, Placebo-Controlled, Investigator-Initiated Clinical Trial (AMARA)
Source: MDPI journal article supplement (doi:10.3390/jcm11247316), 2022-12-09
Supplement: s1 [file s1]

## Supplementary Material

**Effectiveness of different doses of rituximab in combination with leflunomide in the treatment or retreatment of rheumatoid arthritis: part 2 of a randomized, placebo-controlled, investigator-initiated clinical trial (AMARA study)**

**Supplementary Section S1.** Study investigators who enrolled patients in the AMARA study

*Baden-Baden:* Prof. Christoph Fiehn

*Bad Kösen:* Dr. Jörg Kaufmann

*Bad Nauheim:* Prof. Ulf Müller-Ladner

*Berlin:* Dr. Rieke Alten, Prof. Marina Backhaus, Prof. Gerd-Rüdiger Burmester, Prof. Andreas Krause, Dr. Sven Remstedt

*Dresden:* Dr. Leonore Unger

*Erlangen:* Dr. Jörg Wendler

*Frankfurt am Main:* Prof. Harald Burkhardt

*Freiburg:* Dr. Bettina Bannert

*Goslar:* Dr. Karin Rockwitz

*Göttingen:* Prof. Sabine Blaschke

*Greifswald:* Dr. Michael Fiene

*Hedielberg:* Dr. Bernhard Heilig

*Hofheim am Taunus:* Dr. Lothar Meier

*Homburg:* Dr. Gunter Assmann

*Köln:* Prof. Andrea Rubbert-Roth

*Leipzig:* Prof. Christoph Baerwald

*Ludwigsfelde:* Dr. Jörg Kaufmann

*Mainz:* Prof. Peter Härle

*München:* Prof. Herbert Kellner, Prof. Klaus Krüger

*Osnabrück:* Dr. Georg Gauler

*Pima:* Dr. Anett Grässler

*Planegg:* Dr. Martin Welcker

*Ratingen:* Dr. Siegfried Wassenberg

*Regensburg:* Prof Martin Fleck

*Trier:* Prof. Stefan Weiner

*Tübingen:* Dr. Joerg Henes

*Ulm:* Dr. Andreas Viardot

*Wuppertal:* Dr. Carl-Johannes Heinmüller

*Würzburg:* Prof. Hans-Peter Tony

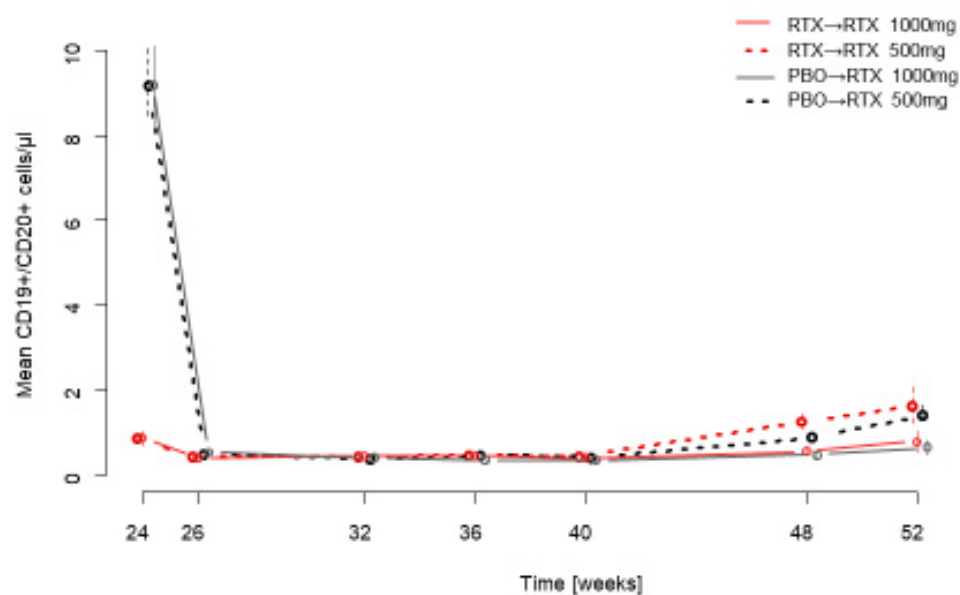

**Supplementary Figure S1.** Changes in B cell counts from week 24 until week 52 of the AMARA study. *PBO*, placebo; *RTX*, rituximab.
